# Supplementary material for: The Effect of High Pressure Homogenization on the Structure of Dual-Protein and Its Emulsion Functional Properties
Source: MDPI journal article supplement (doi:10.3390/foods12183358), 2023-09-07
Supplement: s1 [file s1]

**S1**

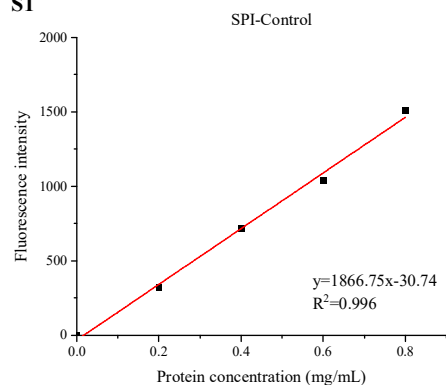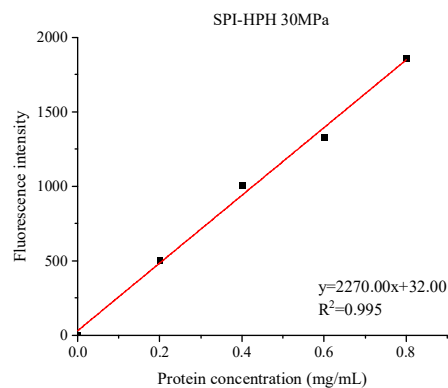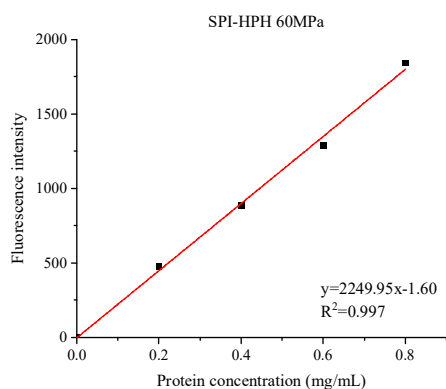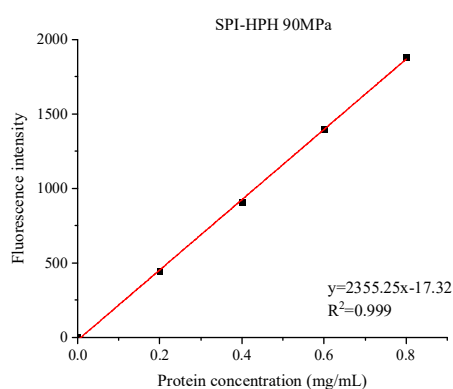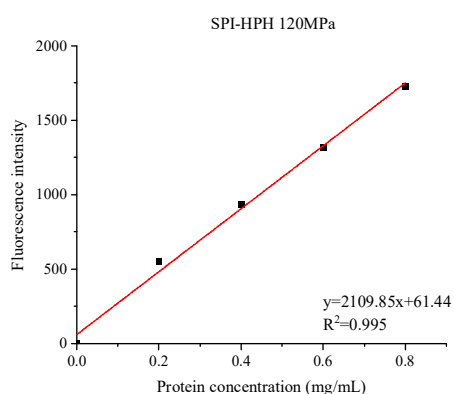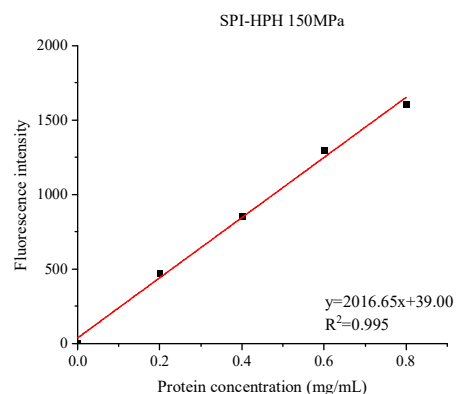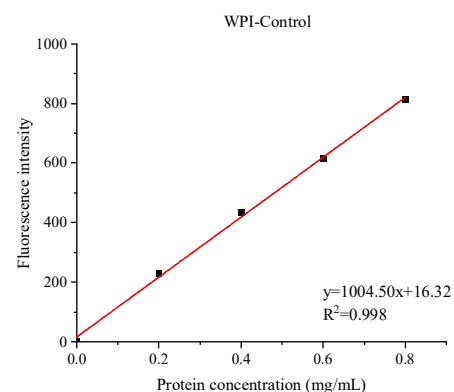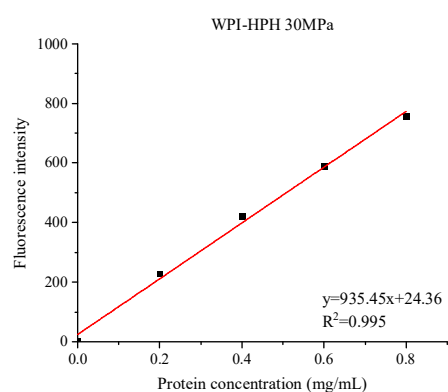

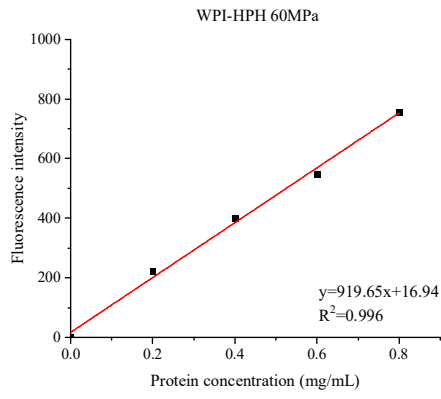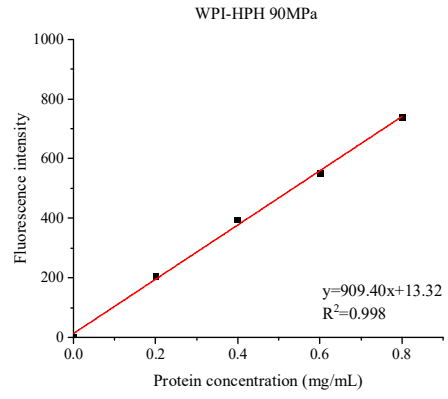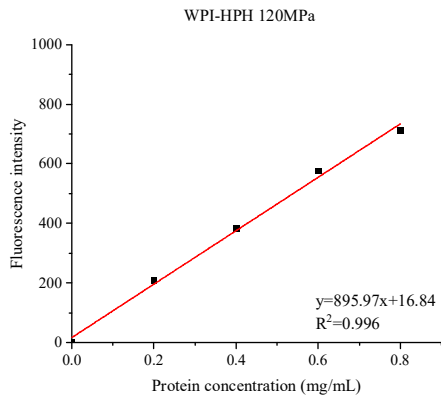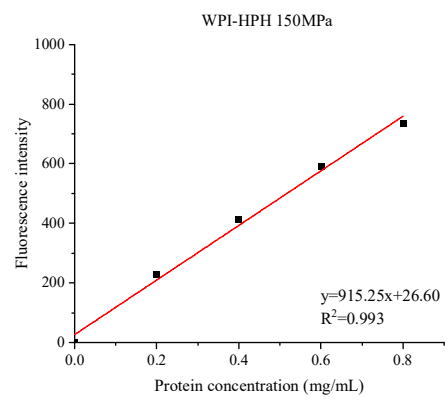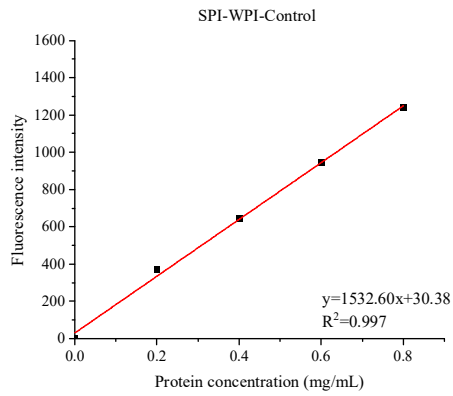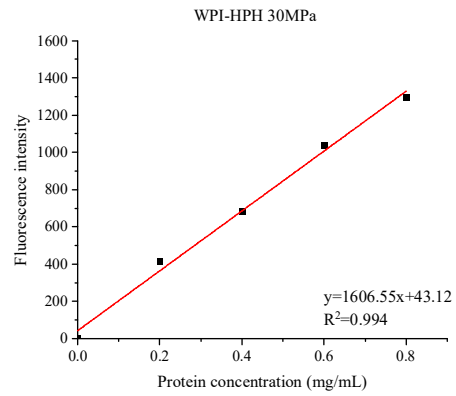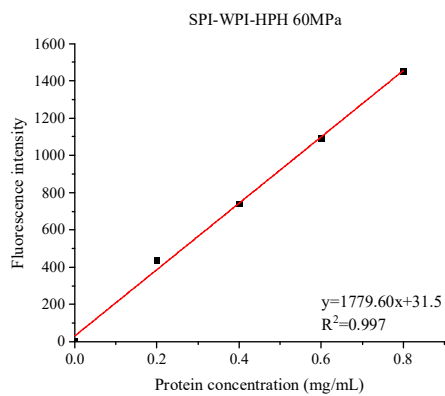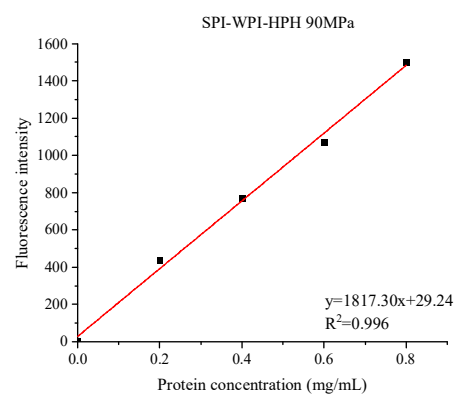

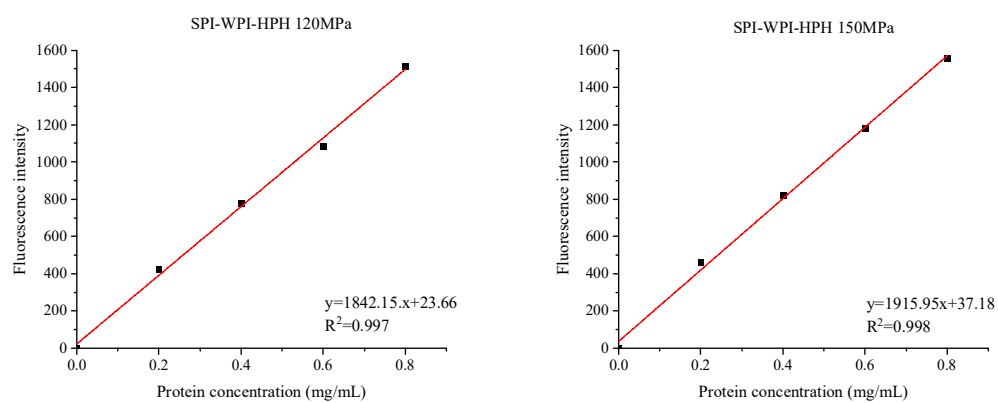

Figure S1. The surface hydrophobicity index ( $H_0$ ) of SPI, WPI, SPI-WPI. The slope of each curve indicates the  $H_0$  of protein.
